# Supplementary material for: Impact evaluation of the free maternal healthcare policy on the risk of neonatal and infant deaths in four sub-Saharan African countries: a quasi-experimental design with propensity score Kernel matching and difference in differences analysis
Source: PubMed Central journal article supplement — BMJ Open. 2020 May 15;10(5):e033356. doi: 10.1136/bmjopen-2019-033356 (PMC7232624; doi:10.1136/bmjopen-2019-033356), 2020-05-15
Supplement: bmjopen-2019-033356supp001.pdf [file bmjopen-2019-033356supp001.pdf]

Supplemental materials for Impact evaluation of the free maternal healthcare policy on infant and neonatal mortality in four sub-Saharan Africa countries: Difference in Differences with Kernel based Propensity Score Matching Analysis.

**S1 Table A: A summary of the trend of neonatal and infant mortality rates among the four comparison and intervention countries in the five years preceding each survey**

|                                                                          | Intervention countries: Implemented free maternal healthcare policy |                                  |                                  |                                         |                                         |                                  | Comparison countries: No free maternal healthcare policy |                                  |                                  |                                       |                                  |                                       |
|--------------------------------------------------------------------------|---------------------------------------------------------------------|----------------------------------|----------------------------------|-----------------------------------------|-----------------------------------------|----------------------------------|----------------------------------------------------------|----------------------------------|----------------------------------|---------------------------------------|----------------------------------|---------------------------------------|
|                                                                          | Ghana                                                               |                                  |                                  | Burkina Faso                            |                                         |                                  | Nigeria                                                  |                                  |                                  | Zambia                                |                                  |                                       |
|                                                                          | 2003<br>Ref period:<br>1999-2003                                    | 2008<br>Ref period:<br>2004-2008 | 2014<br>Ref period:<br>2010-2014 | 2003<br>Ref<br>period:<br>1999-<br>2003 | 2010<br>Ref<br>period:<br>2006-<br>2010 | 2014<br>Ref period:<br>2010-2014 | 2003<br>Ref<br>period:<br>1999-<br>2003                  | 2008<br>Ref period:<br>2004-2008 | 2014<br>Ref period:<br>2009-2013 | 2001/2002<br>Ref period:<br>1998-2002 | 2007<br>Ref period:<br>2003-2007 | 2013/2014<br>Ref period:<br>2009-2013 |
| Number of live births in five years preceding the interview              | 3844                                                                | 2992                             | 5884                             | 10645                                   | 15044                                   | 6841                             | 6029                                                     | 28647                            | 31482                            | 6877                                  | 6401                             | 13457                                 |
| Number of women age 15-49 interviewed                                    | 5691                                                                | 4916                             | 9396                             | 12477                                   | 17087                                   | 8 111                            | 7620                                                     | 33385                            | 38948                            | 7658                                  | 7146                             | 16411                                 |
| Total number of women age 15-49 in the country at the time of the survey | 4170068                                                             | 4891557                          | 5655156                          | 2451363                                 | 3030545                                 | 3416421                          | 25619994                                                 | 28997441                         | 32791677                         | 2143989                               | 2506625                          | 3129094                               |
| Survey response rate for eligible women interviewed (%)                  | 95.7                                                                | 96.5                             | 97.3                             | 96.3                                    | 98.4                                    | 98.7                             | 95.0                                                     | 97.0                             | 97.9                             | 96.4                                  | 97.0                             | 96.0                                  |
| NMR per 1000 live births                                                 | 43                                                                  | 30                               | 29                               | 31                                      | 28                                      | 27.3                             | 48                                                       | 40                               | 37                               | 37                                    | 34                               | 24                                    |
| IMR per 1000 live births                                                 | 64                                                                  | 50                               | 41                               | 81                                      | 65                                      | 61.4                             | 100                                                      | 75                               | 69                               | 95                                    | 70                               | 45                                    |
| Cumulative incidence rate per 1000 person years at risk: Infant deaths   | 30<br>[24.2-37.7]                                                   | 28.5<br>[22.5-36.8]              | 15.1<br>[11.9-19.4]              | 67.9<br>[61.9-74.6]                     | 44.3<br>[40.5-48.5]                     | 23.7 [21.3-26.4]                 | 63.2<br>[55.6-72.1]                                      | 50.6<br>[47.7-53.7]              | 36.8<br>[34.3-39.6]              | 70.5<br>[63.8-78.2]                   | 44.7<br>[39.1-51.4]              | 26.5<br>[23.2-30.5]                   |

Abbreviations: IMR: Infant mortality rate, NMR: Neonatal mortality rate.

**S1 Table B: Assessing the performance of the kernel matching: Balancing test based on standardized mean difference between the two groups (FMHCP and comparison group).**

|                                                     | Before Matching |                  |                                 | After Matching |                  |                                 |
|-----------------------------------------------------|-----------------|------------------|---------------------------------|----------------|------------------|---------------------------------|
|                                                     | FMHCP<br>Mean   | No FMHCP<br>Mean | Standardized Mean<br>Difference | FMHCP<br>Mean  | No FMHCP<br>Mean | Standardized Mean<br>Difference |
| <b>Sex</b>                                          |                 |                  |                                 |                |                  |                                 |
| Male                                                | 0.83            | 0.90             | -0.19                           | 0.83           | 0.81             | 0.06                            |
| Female                                              | 0.17            | 0.10             | 0.19                            | 0.17           | 0.19             | 0.06                            |
| <b>Wealth</b>                                       |                 |                  |                                 |                |                  |                                 |
| Poorest                                             | 0.23            | 0.23             | -0.02                           | 0.23           | 0.23             | 0.02                            |
| Poorer                                              | 0.21            | 0.23             | -0.04                           | 0.21           | 0.21             | 0.02                            |
| Middle                                              | 0.20            | 0.19             | 0.03                            | 0.20           | 0.20             | 0.01                            |
| Richer                                              | 0.20            | 0.18             | 0.05                            | 0.20           | 0.20             | 0.00                            |
| Richest                                             | 0.16            | 0.17             | -0.02                           | 0.16           | 0.16             | 0.01                            |
| <b>Household size</b>                               |                 |                  |                                 |                |                  |                                 |
| ≤ 4                                                 | 0.29            | 0.25             | 0.10                            | 0.29           | 0.31             | -0.03                           |
| 5 - 7                                               | 0.40            | 0.42             | -0.03                           | 0.40           | 0.41             | 0.01                            |
| 8+                                                  | 0.31            | 0.33             | -0.06                           | 0.31           | 0.29             | 0.04                            |
| <b>Household access to an improved water source</b> |                 |                  |                                 |                |                  |                                 |
| Improved                                            | 0.90            | 0.78             | 0.34                            | 0.90           | 0.90             | 0.00                            |
| Not improved                                        | 0.10            | 0.22             | -0.34                           | 0.10           | 0.10             | 0.00                            |
| <b>Household access to improved toilet</b>          |                 |                  |                                 |                |                  |                                 |
| Improved, not shared                                | 0.13            | 0.30             | -0.44                           | 0.13           | 0.12             | 0.01                            |
| Improved, shared                                    | 0.37            | 0.19             | 0.40                            | 0.37           | 0.39             | 0.04                            |
| Not improved                                        | 0.50            | 0.50             | 0.00                            | 0.50           | 0.49             | 0.03                            |
| <b>Geographic location</b>                          |                 |                  |                                 |                |                  |                                 |
| Urban                                               | 0.31            | 0.32             | -0.03                           | 0.31           | 0.32             | 0.02                            |
| Rural                                               | 0.69            | 0.68             | 0.03                            | 0.69           | 0.68             | 0.02                            |
| <b>Household owns a mosquito net</b>                |                 |                  |                                 |                |                  |                                 |
| No                                                  | 0.20            | 0.52             | -0.71                           | 0.20           | 0.20             | 0.01                            |
| Yes                                                 | 0.80            | 0.48             | 0.71                            | 0.80           | 0.80             | 0.01                            |
| <b>Mother's age at child's birth</b>                |                 |                  |                                 |                |                  |                                 |
| < 18                                                | 0.03            | 0.03             | -0.05                           | 0.03           | 0.02             | 0.00                            |
| 18 - 34                                             | 0.72            | 0.71             | 0.00                            | 0.72           | 0.73             | 0.03                            |
| 35+                                                 | 0.26            | 0.25             | 0.02                            | 0.26           | 0.24             | 0.03                            |
| <b>Educational attainment</b>                       |                 |                  |                                 |                |                  |                                 |
| None                                                | 0.54            | 0.45             | 0.19                            | 0.54           | 0.53             | 0.02                            |
| Primary                                             | 0.17            | 0.24             | -0.17                           | 0.17           | 0.18             | 0.00                            |
| Secondary                                           | 0.26            | 0.25             | 0.02                            | 0.26           | 0.27             | 0.02                            |
| Tertiary                                            | 0.02            | 0.05             | -0.18                           | 0.02           | 0.02             | 0.01                            |
| <b>Birth order</b>                                  |                 |                  |                                 |                |                  |                                 |
| First                                               | 0.29            | 0.19             | 0.22                            | 0.29           | 0.29             | 0.00                            |
| Second                                              | 0.26            | 0.17             | 0.20                            | 0.26           | 0.26             | 0.00                            |
| Third                                               | 0.15            | 0.15             | -0.02                           | 0.15           | 0.14             | 0.01                            |
| Fourth or higher                                    | 0.31            | 0.48             | -0.35                           | 0.31           | 0.31             | 0.00                            |
| <b>Birth type</b>                                   |                 |                  |                                 |                |                  |                                 |
| Single birth                                        | 0.96            | 0.97             | -0.04                           | 0.96           | 0.95             | 0.03                            |
| Multiple birth                                      | 0.04            | 0.03             | 0.04                            | 0.04           | 0.05             | 0.03                            |

Abbreviation: FMHCP: Free maternal healthcare policy

**S1 Table C: Assessing the performance of the kernel matching: Balancing test based on the ratio of variances between the two groups (FMNH and comparison group).**

|                                                     | Before matching   |                      |       | After matching    |                      |       |
|-----------------------------------------------------|-------------------|----------------------|-------|-------------------|----------------------|-------|
|                                                     | FMHCP<br>Variance | No FMHCP<br>Variance | Ratio | FMHCP<br>Variance | No FMHCP<br>Variance | Ratio |
| <b>Sex</b>                                          |                   |                      |       |                   |                      |       |
| Male                                                | 0.14              | 0.09                 | 1.49  | 0.14              | 0.15                 | 0.92  |
| Female                                              | 0.14              | 0.09                 | 1.49  | 0.14              | 0.15                 | 0.92  |
| <b>Wealth</b>                                       |                   |                      |       |                   |                      |       |
| Poorest                                             | 0.17              | 0.18                 | 0.97  | 0.17              | 0.18                 | 0.98  |
| Poorer                                              | 0.17              | 0.18                 | 0.95  | 0.17              | 0.16                 | 1.03  |
| Middle                                              | 0.16              | 0.16                 | 1.05  | 0.16              | 0.16                 | 1.02  |
| Richer                                              | 0.16              | 0.15                 | 1.08  | 0.16              | 0.16                 | 1.00  |
| Richest                                             | 0.13              | 0.14                 | 0.96  | 0.13              | 0.14                 | 0.98  |
| <b>Household size</b>                               |                   |                      |       |                   |                      |       |
| ≤ 4                                                 | 0.21              | 0.19                 | 1.11  | 0.21              | 0.21                 | 0.98  |
| 5 -7                                                | 0.24              | 0.24                 | 0.99  | 0.24              | 0.24                 | 1.00  |
| 8+                                                  | 0.21              | 0.22                 | 0.96  | 0.21              | 0.21                 | 1.04  |
| <b>Household access to an improved water source</b> |                   |                      |       |                   |                      |       |
| Improved                                            | 0.09              | 0.17                 | 0.51  | 0.09              | 0.09                 | 0.99  |
| Not improved                                        | 0.09              | 0.17                 | 0.51  | 0.09              | 0.09                 | 0.99  |
| <b>Household access to improved toilet</b>          |                   |                      |       |                   |                      |       |
| Improved, not shared                                | 0.11              | 0.21                 | 0.53  | 0.11              | 0.11                 | 1.02  |
| Improved, shared                                    | 0.23              | 0.16                 | 1.49  | 0.23              | 0.24                 | 0.98  |
| Not improved                                        | 0.25              | 0.25                 | 1.00  | 0.25              | 0.25                 | 1.00  |
| <b>Geographic location</b>                          |                   |                      |       |                   |                      |       |
| Urban                                               | 0.21              | 0.22                 | 0.98  | 0.21              | 0.22                 | 0.98  |
| Rural                                               | 0.21              | 0.22                 | 0.98  | 0.21              | 0.22                 | 0.98  |
| <b>Household owns a mosquito net<sup>3</sup></b>    |                   |                      |       |                   |                      |       |
| No                                                  | 0.16              | 0.25                 | 0.64  | 0.16              | 0.16                 | 0.98  |
| Yes                                                 | 0.16              | 0.25                 | 0.64  | 0.16              | 0.16                 | 0.98  |
| <b>Mother's age at child's birth</b>                |                   |                      |       |                   |                      |       |
| < 18                                                | 0.02              | 0.03                 | 0.74  | 0.02              | 0.02                 | 1.02  |
| 18 - 34                                             | 0.20              | 0.20                 | 1.00  | 0.20              | 0.20                 | 1.04  |
| 35+                                                 | 0.19              | 0.19                 | 1.02  | 0.19              | 0.18                 | 1.04  |
| <b>Educational attainment</b>                       |                   |                      |       |                   |                      |       |
| None                                                | 0.25              | 0.25                 | 1.00  | 0.25              | 0.25                 | 1.00  |
| Primary                                             | 0.14              | 0.18                 | 0.78  | 0.14              | 0.14                 | 1.00  |
| Secondary                                           | 0.19              | 0.19                 | 1.02  | 0.19              | 0.20                 | 0.98  |
| Tertiary                                            | 0.02              | 0.05                 | 0.39  | 0.02              | 0.02                 | 0.92  |
| <b>Birth order</b>                                  |                   |                      |       |                   |                      |       |
| First                                               | 0.21              | 0.16                 | 1.31  | 0.20              | 0.21                 | 1.00  |
| Second                                              | 0.19              | 0.14                 | 1.32  | 0.19              | 0.19                 | 1.00  |
| Third                                               | 0.12              | 0.13                 | 0.96  | 0.12              | 0.12                 | 1.02  |
| Fourth or higher                                    | 0.21              | 0.25                 | 0.86  | 0.21              | 0.21                 | 1.00  |
| <b>Birth type</b>                                   |                   |                      |       |                   |                      |       |
| Single birth                                        | 0.04              | 0.03                 | 1.23  | 0.04              | 0.05                 | 0.89  |
| Multiple birth                                      | 0.04              | 0.03                 | 1.23  | 0.04              | 0.05                 | 0.89  |

Abbreviation: FMHCP: Free maternal healthcare policy
